# Supplementary material for: Relating Molecular T Cell–mediated Rejection Activity in Kidney Transplant Biopsies to Time and to Histologic Tubulitis and Atrophy-fibrosis
Source: PubMed Central journal article supplement — Transplantation. 2023 Apr 22;107(5):1102–14. doi: 10.1097/TP.0000000000004396 (PMC10125115; doi:10.1097/tp.0000000000004396), 2023-04-22
Supplement: tpa-107-1102-s001.pdf [file tpa-107-1102-s001.pdf]

**Supplementary Table S1. Participating Centers**

| <b>Location</b>             | <b>Principal investigators</b>                 | <b>Samples contributed</b> |
|-----------------------------|------------------------------------------------|----------------------------|
| <b>Birmingham, AL, USA</b>  | Roslyn Mannon                                  | 28                         |
| <b>Barcelona, Spain</b>     | Daniel Serón and Joana Sellarés                | 71                         |
| <b>Bronx, NY, USA</b>       | Enver Akalin                                   | 33                         |
| <b>Manchester, UK</b>       | Declan de Freitas and Michael Picton           | 39                         |
| <b>Baltimore, MD, USA</b>   | Jonathan Bromberg and Matt Weir                | 72                         |
| <b>Berlin, Germany</b>      | Klemens Budde and Timm Heinbokel               | 12                         |
| <b>Hannover, Germany</b>    | Gunilla Einecke                                | 67                         |
| <b>Harrisburg, PA, USA</b>  | Harold Yang and Seth Narins                    | 12                         |
| <b>Detroit, MI, USA</b>     | Milagros Samaniego-Picota                      | 1                          |
| <b>Paris, France</b>        | Carmen Lefaucheur, Alexandre Loupy             | 212                        |
| <b>Poland</b>               | Marek Myslak and Agnieszka Perkowska-Ptasinska | 2                          |
| <b>San Antonio, TX, USA</b> | Adam Bingaman                                  | 83                         |
| <b>St Louis, MO, USA</b>    | Daniel Brennan and Andrew Malone               | 20                         |
| <b>Minneapolis, MN, USA</b> | Bertram Kasiske                                | 6                          |
| <b>Edmonton, AB, CA</b>     | Philip F Halloran                              | 487                        |
| <b>Minneapolis, MN, USA</b> | Arthur Matas                                   | 76                         |
| <b>Madison, WI, USA</b>     | Arjang Djamali                                 | 10                         |
| <b>Vienna, Austria</b>      | Georg Böhmig and Farsad Eskandary              | 198                        |
| <b>Richmond, VA, USA</b>    | Gaurav Gupta                                   | 250                        |
| <b>TOTAL</b>                |                                                | <b>1679</b>                |

| <b>Supplementary Table S2. Patient demographics and biopsy data</b> |                                                      |                              |                                            |
|---------------------------------------------------------------------|------------------------------------------------------|------------------------------|--------------------------------------------|
| <b>Patient Demographics</b>                                         |                                                      | <b>All patients (N=1381)</b> | <b>All archetype TCMR patients (N=161)</b> |
| <b>Mean recipient age (range)</b>                                   |                                                      | 51 (8 – 91)                  | 47 (10 – 78)                               |
| <b>Recipient Gender Male (% male)</b>                               |                                                      | 702 (51%)                    | 100 (69%)                                  |
| <b>Ethnicity</b>                                                    | Caucasian                                            | 607                          | 79                                         |
|                                                                     | Black                                                | 171                          | 24                                         |
|                                                                     | Other                                                | 147                          | 23                                         |
|                                                                     | Not available <sup>a</sup>                           | 456                          | 35                                         |
| <b>Primary Disease</b>                                              | Diabetic nephropathy                                 | 211                          | 24                                         |
|                                                                     | Hypertension / large vessel disease                  | 94                           | 16                                         |
|                                                                     | Glomerulonephritis / vasculitis                      | 47                           | 49                                         |
|                                                                     | Interstitial nephritis / pyelonephritis              | 26                           | 10                                         |
|                                                                     | Polycystic kidney disease                            | 125                          | 9                                          |
|                                                                     | Others                                               | 767                          | 21                                         |
|                                                                     | Unknown etiology                                     | 111                          | 32                                         |
| <b>Mean donor age (range)</b>                                       |                                                      | 44 (0.03 – 85)               | 42 (1 – 80)                                |
| <b>Donor gender (% male)</b>                                        |                                                      | 386 (28%)                    | 48 (40%)                                   |
| <b>Donor type (% deceased donor transplants)</b>                    |                                                      | 889 (64%)                    | 98 (65%)                                   |
| <b>Latest kidney status (% of total)</b>                            | Patient alive – graft functioning                    | 1001 (80%)                   | 101 (69%)                                  |
|                                                                     | Patient death - graft failure                        | 231 (18%)                    | 43 (29%)                                   |
|                                                                     | Patient death – cause other than graft failure       | 20 (2%)                      | 3 (2%)                                     |
|                                                                     | Mean (median) follow-up (functioning grafts) in days | 720 (405)                    | 734 (393)                                  |
| <b>Clinical characteristics at time of biopsy</b>                   |                                                      | <b>All biopsies (N=1679)</b> | <b>All archetype TCMR biopsies (N=175)</b> |
| <b>Median time of biopsy post-transplant (TxBx) in days (range)</b> |                                                      | 650 (1 day – 34 years)       | 360 (6 days – 26 years)                    |
| <b>Early biopsies (&lt; 1 year) (% total)</b>                       |                                                      | 709 (42%)                    | 88 (50%)                                   |
| <b>Late biopsies (≥ 1 year) (% total)</b>                           |                                                      | 966 (57%) <sup>b</sup>       | 87 (50%)                                   |
| <b>Indication for biopsy (% of total)</b>                           | Primary non-function                                 | 10 (1%)                      | 1 (1%)                                     |
|                                                                     | Rapid deterioration of graft function                | 292 (17%)                    | 63 (36%)                                   |
|                                                                     | Slow deterioration of graft function                 | 307 (18%)                    | 33 (19%)                                   |

|                                                 |           |          |
|-------------------------------------------------|-----------|----------|
| Stable impaired graft function                  | 92 (5%)   | 11 (6%)  |
| Investigate proteinuria/rejection/BK/creatinine | 247 (15%) | 30 (17%) |
| Delayed graft function                          | 74 (4%)   | 6 (3%)   |
| Others                                          | 617 (37%) | 27 (15%) |
| Indication unknown                              | 40 (2%)   | 4 (2%)   |

<sup>a</sup> Some centers preferred not to identify ethnicity

<sup>b</sup> Four biopsies had no date of transplant

Abbreviations: TxBx – time of biopsy posttransplant

**Supplementary Table S3. List of transcript sets used in this paper<sup>a</sup>**

| Transcript set                       | Abbreviation | Description of the transcripts                      |
|--------------------------------------|--------------|-----------------------------------------------------|
| <b>TCMR-related</b>                  | TCB          | T cell burden (1)                                   |
|                                      | QCAT         | Cytotoxic T cell associated (2)                     |
| <b>ABMR-related</b>                  | DSAST        | DSA selective (3)                                   |
|                                      | NKB          | NK cell transcript burden (1)                       |
|                                      | ENDAT        | Endothelial cell associated (4)                     |
|                                      | GRIT         | Interferon gamma-inducible (5)                      |
| <b>Expressed in macrophages</b>      | QCMAT        | Quantitative constitutive macrophage-associated (6) |
|                                      | AMAT         | alternative macrophage activation-associated (6)    |
| <b>Increased after recent injury</b> | IRRAT        | Injury-repair response associated (7)               |
|                                      | FICOL        | Fibrillar collagen transcripts (8)                  |
|                                      | IRITD3       | Injury-repair induced transcripts, day 3 (9)        |
|                                      | IRITD5       | Injury-repair induced transcripts, day 5 (9)        |
| <b>Atrophy-fibrosis</b>              | IGT          | Immunoglobulin transcripts (10)                     |

<sup>a</sup> <https://www.ualberta.ca/medicine/institutes-centres-groups/atagc/research/gene-lists>

Abbreviations: AMAT – alternative macrophage activation transcripts; DSAST - donor-specific antibody (DSA) selective transcripts; ENDAT – endothelial cell-associated transcripts; GRIT – interferon gamma-inducible transcripts; IGT – immunoglobulin transcripts; IRRAT – AKI transcripts; NKB – NK cell burden transcripts; QCAT - Cytotoxic T cell associated transcripts; QCMAT – quantitative constitutive macrophage-associated transcripts; TCB – T cell burden transcripts

**References**

- Hidalgo LG, Sellares J, Sis B, Mengel M, Chang J, Halloran PF. Interpreting NK cell transcripts versus T cell transcripts in renal transplant biopsies. *Am J Transplant.* 2012;12(5):1180-91.
- Hidalgo LG, Einecke G, Allanach K, Mengel M, Sis B, Mueller TF, et al. The transcriptome of human cytotoxic T cells: measuring the burden of CTL-associated transcripts in human kidney transplants. *Am J Transplant.* 2008;8(3):637-46.
- Hidalgo LG, Sis B, Sellares J, Campbell PM, Mengel M, Einecke G, et al. NK cell transcripts and NK cells in kidney biopsies from patients with donor-specific antibodies: evidence for NK cell involvement in antibody-mediated rejection. *Am J Transplant.* 2010;10(8):1812-22.
- Einecke G, Sis B, Reeve J, Mengel M, Campbell PM, Hidalgo LG, et al. Antibody-Mediated Microcirculation Injury Is the Major Cause of Late Kidney Transplant Failure. *American Journal of Transplantation.* 2009;9(11):2520-31.
- Halloran PF, Venner JM, Famulski KS. Comprehensive Analysis of Transcript Changes Associated With Allograft Rejection: Combining Universal and Selective Features. *Am J Transplant.* 2017;17(7):1754-69.
- Famulski KS, Einecke G, Sis B, Mengel M, Hidalgo LG, Kaplan B, et al. Defining the canonical form of T-cell-mediated rejection in human kidney transplants. *Am J Transplant.* 2010;10(4):810-20.
- Famulski KS, de Freitas DG, Kreepala C, Chang J, Sellares J, Sis B, et al. Molecular phenotypes of acute kidney injury in human kidney transplants. *Journal of the American Society of Nephrology.* 2012;23(5):948-58.
- Famulski KS, Reeve J, de Freitas DG, Kreepala C, Chang J, Halloran PF. Kidney transplants with progressing chronic diseases express high levels of acute kidney injury transcripts. *Am J Transplant* 2013; 13(3): 634-44.
- Famulski KS, Broderick G, Einecke G, et al. Transcriptome analysis reveals heterogeneity in the injury response of kidney transplants. *Am J Transplant* 2007; 7(11): 2483-95.
- Einecke G, Reeve J, Mengel M, Sis B, Bunnag S, Mueller TF, et al. Expression of B cell and immunoglobulin transcripts is a feature of inflammation in late allografts. *American Journal of Transplantation.* 2008;8(7):1434-43.

**Supplementary Table S4. Relating MMDx signout diagnoses to archetype assignments in 1679 biopsies**

| MMDx signout assignments                               | Archetype group assignments |            |            |            |            |            | Row Totals |
|--------------------------------------------------------|-----------------------------|------------|------------|------------|------------|------------|------------|
|                                                        | 1<br>NR                     | 2<br>TCMR1 | 3<br>TCMR2 | 4<br>EABMR | 5<br>FABMR | 6<br>LABMR |            |
| <b>ABMR</b>                                            | 70                          | 0          | 5          | 192        | 175        | 67         | 509        |
| <b>Mixed</b>                                           | 2                           | 44         | 13         | 2          | 7          | 1          | 69         |
| <b>NR</b>                                              | 898                         | 0          | 0          | 6          | 0          | 1          | 905        |
| <b>pABMR</b>                                           | 43                          | 0          | 0          | 7          | 0          | 2          | 52         |
| <b>pTCMR</b>                                           | 9                           | 0          | 10         | 2          | 0          | 0          | 21         |
| <b>TCMR</b>                                            | 18                          | 31         | 72         | 1          | 0          | 1          | 123        |
| <b>Column Totals</b>                                   | 1040                        | 75         | 100        | 210        | 182        | 72         | 1679       |
| <p>pABMR, possible ABMR.<br/>pTCMR, possible TCMR.</p> |                             |            |            |            |            |            |            |



**Supplementary Table S5. Top 20 genes by Spearman correlation decreased (negatively correlated) with time post-transplant within molecular TCMR biopsies >1 year (archetypes TCMR1/2, N=86)**

| Gene Symbol | Gene Name                                                          | PBT                                 | Spearman correlation with time posttransplant <sup>A</sup> |
|-------------|--------------------------------------------------------------------|-------------------------------------|------------------------------------------------------------|
| SIGLEC11    | sialic acid binding Ig-like lectin 11                              | (inflammation)                      | -0.45                                                      |
| CD8A        | CD8a molecule                                                      | QCAT,TCMR-RAT                       | -0.42                                                      |
| ANKRD22     | ankyrin repeat domain 22                                           | GRIT3,TCMR-RAT                      | -0.42                                                      |
| ST8SIA5     | ST8 alpha-N-acetyl-neuraminide alpha-2,8sialyltransferase 5        |                                     | -0.42                                                      |
| LAG3        | lymphocyte-activation gene 3                                       | TCMR-RAT                            | -0.41                                                      |
| HLA-F       | major histocompatibility complex, class I, F                       | GRIT3,TCMR-RAT                      | -0.39                                                      |
| NUSAP1      | nucleolar and spindle associated protein 1                         | IRITD5,QCAT, endothelium            | -0.39                                                      |
| HLA-F       | major histocompatibility complex, class I, F                       | ABMR-RAT,GRIT3,RAT,Rej-RAT,TCMR-RAT | -0.38                                                      |
| NUSAP1      | nucleolar and spindle associated protein 1                         | IRITD5,IRRAT950,LivGST_UP,QCAT      | -0.38                                                      |
| CALCA       | calcitonin-related polypeptide alpha                               |                                     | -0.37                                                      |
| MYRFL       | myelin regulatory factor-like                                      |                                     | -0.37                                                      |
| GMNN        | geminin, DNA replication inhibitor                                 |                                     | -0.37                                                      |
| UBE2T       | ubiquitin-conjugating enzyme E2T (putative)                        | IRRAT950                            | -0.37                                                      |
| ATP6AP1     | ATPase, H <sup>+</sup> transporting, lysosomal accessory protein 1 |                                     | -0.36                                                      |
| HLA-B       | major histocompatibility complex, class I, B                       | GRIT1, Rej-RAT                      | -0.36                                                      |
| EOMES       | eomesodermin                                                       | TCMR-RAT                            | -0.35                                                      |
| EOMES       | eomesodermin                                                       | TCMR-RAT                            | -0.35                                                      |
| MAP3K15     | mitogen-activated protein kinase kinase kinase 15                  | Dendritic cells                     | -0.35                                                      |
| GBP4        | guanylate binding protein 4                                        | GRIT3, Rej-RAT                      | -0.35                                                      |
| ZNF672      | zinc finger protein 672                                            |                                     | -0.35                                                      |

<sup>A</sup> All P values<0.001

Abbreviations: PBTs are listed on our home page <https://www.ualberta.ca/medicine/institutes-centres-groups/ataqc/research/gene-lists>

**Supplementary Table 6. Top 20 genes increased (positively correlated) with time post-transplant within molecular TCMR biopsies >1 year (archetypes TCMR1/2, N=86)**

| Gene Symbol | Gene Name                                                              | PBT    | Spearman correlation with time posttransplant <sup>A</sup> |
|-------------|------------------------------------------------------------------------|--------|------------------------------------------------------------|
| COL23A1     | collagen, type XXIII, alpha 1                                          |        | 0.42                                                       |
| IGHA1       | immunoglobulin heavy constant alpha 1                                  | IGT    | 0.39                                                       |
| RTN4RL2     | reticulon 4 receptor-like 2                                            |        | 0.39                                                       |
| NFIA        | nuclear factor I                                                       | HT1    | 0.38                                                       |
| IGHA1       | immunoglobulin heavy constant alpha 1                                  | IGT    | 0.38                                                       |
| IGH         | immunoglobulin heavy locus                                             | IGT    | 0.38                                                       |
| IGH         | immunoglobulin heavy locus                                             | IGT    | 0.37                                                       |
| MAP1LC3C    | microtubule-associated protein 1 light chain 3 gamma                   |        | 0.37                                                       |
| MOGAT2      | monoacylglycerol O-acyltransferase 2                                   | CT1    | 0.37                                                       |
| IGH         | immunoglobulin heavy locus                                             | IGT    | 0.37                                                       |
| PCSK1       | proprotein convertase subtilisin                                       |        | 0.37                                                       |
| CLU         | clusterin                                                              | IRITD5 | 0.37                                                       |
| SNAP91      | synaptosomal-associated protein, 91kDa                                 |        | 0.37                                                       |
| NALCN       | sodium leak channel, non-selective                                     |        | 0.36                                                       |
| IGH         | immunoglobulin heavy locus                                             | IGT    | 0.36                                                       |
| ABI3BP      | ABI family, member 3 (NESH) binding protein                            | ENDAT  | 0.36                                                       |
| ADRA2C      | adrenoceptor alpha 2C                                                  |        | 0.36                                                       |
| CCDC122     | coiled-coil domain containing 122                                      | LT1    | 0.36                                                       |
| SLC6A1      | solute carrier family 6 (neurotransmitter transporter, GABA), member 1 |        | 0.36                                                       |
| DEFB113     | defensin, beta 113                                                     |        | 0.36                                                       |

<sup>A</sup> All P values < 0.001

Abbreviations: PBTs are listed on our home page <https://www.ualberta.ca/medicine/institutes-centres-groups/ataqc/research/gene-lists>
